# Supplementary material
Source: publisher figshare collection journal article supplement (https://sage.figshare.com/ndownloader/files/13569308)
Supplement: Supplementary file 1 [file 13569308]

# Online Appendix A: Underrepresented Minority Students

## 1 Combining Black and Hispanic Students as an “Underrepresented Minority” Group

For both theoretical and practical reasons, scholars often have combined black and Hispanic students into an “underrepresented minority” (hereafter, “UM”) group to pursue empirical analyses. Theoretically, black and Hispanic students share important similarities due to their minority status. For example, both black and Hispanic students on average come from lower-SES backgrounds, experience lesser academic preparation than white students, and sometimes face greater socio-emotional challenges as compared to white students while attending college (e.g. Bowen et al. 2009; Carter 2006; Charles et al. 2009). Because black and Hispanic students are together only about a quarter of American population, the sample sizes for these groups in nationally representative data sets that focus on education is often relatively small. To generate more precise results, some scholars have combined black and Hispanic students in their analyses under the assumption that the estimated coefficients for these two groups would be roughly similar (Alon 2015; Lavin and Crook 1990; Light and Strayer 2002; Rendón et al. 2000).

## 2 Data Considerations

To produce results comparing UM and white college students, we draw on the same data as employed in the analyses in the main text, namely, the Education Longitudinal Study (ELS): 2002 and the Integrated Postsecondary Education Data System (IPEDS). In line with our analysis of black and white students, we focus on first-time freshmen who enter four-year college by the fall of 2006. Based on this timing, we typically gain a seven-to-nine year window to observe whether students complete bachelor’s degrees (BAs). Within the ELS data, 3,280 UM students who were part of the sophomore class of 2002 earned a high school diploma or GED prior to the fall 2006, as compared with 1,570 black students and 7,410 of white students.<sup>1</sup> Of this group, 32.2 percent,

---

<sup>1</sup>The National Center of Education Statistics (NCES) requires rounding sample counts to the nearest 10.

or 1,060 UM students, enrolled in four-year college by the fall of 2006, as compared to 37.7 percent of black students and 47.6 percent of white students similarly enrolled in four-year college.

Of the total 1,060 UM students who enroll in four-year college, 46.8 percent leave college by the censoring point in our data without earning a degree (as compared to 50.4 percent of black students and 25.4 percent of white students). While dropout is highest in students' first two years of college attendance (93 percent of students enroll by September 2004), students leave college at all points within our window of analysis. Of the nearly 1,400 students who comprise the dropout population, 8.9 percent in fact are still enrolled in college at the censoring point of the data (see Table 2). On the whole, these patterns are very similar to those we observe for black and white students.

### 3 Notable Differences in Results

Hispanic students historically have been less likely to enroll in four-year college than black students (Bowen et al. 2009). The gap has lessened recently (Snyder et al. 2016), but it remains present in the ELS data. At the point of selection into four-year college, the gap in entry rates between UM and white students is notably larger than that between black and white students (16 percentage points as compared to 11; the entry rate for UM students is 32 percent as compared to 37 percent for black students and 48 percent for white students).

Second, Hispanic students respond to their pre-college distribution of resources more similarly to white students than to black students at the point of college entry (see Table 3 and Figure 1, panel B). If UM students entered college in the same way as white students, the entry rate only would fall by one percentage point, from 32 to 31 percent of UM high school graduates. Instead, the distribution of pre-college resources serves as a much more important reason for the UM-white gap in four-year college entry (a Fairlie decomposition providing further support for this finding is available by request). In short, while Hispanic students' *response* to their pre-college resources more closely resembles white students' when it comes to college dropout, their actual *distribution* of pre-college resources is more similar to black students'. The net result is a more moderate impact of paradoxical persistence on the BA completion and attainment gaps: though the UM dropout rate is higher than it would be if UM students entered college in the same way

as white students (46.8 percent versus 45.9 percent), thereby slightly expanding the BA completion gap, this difference at the point of college entry increases the BA attainment rate among UM students from the counterfactual rate of 16.6 percent to the actual rate of 17.1 percent. This increase in turn lowers the BA attainment gap by 3 percent.

Third, when examining the matching process between UM students and college quality destinations, Hispanic students again appear more similar to white students than to black students in their enrollment decisions (see Figure 2). Specifically, Hispanic students' college quality destinations are more aligned with their pre-college dropout risk than black students, a pattern we also observe for white students. That said, the actual distribution of college quality destinations in fact more closely resembles that of black students, leading to similar impacts of the role of matching and college quality on the overall UM-white BA gap as we observed for the black-white BA gap.

Fourth and finally, turning to UM students' experiences while attending four-year college, we mainly find large similarities in the results for UM students as compared to black students. However, in evaluating why UM students might achieve lower college grades than white students, we do not find that college quality plays as much of a role for the combined black and Hispanic students as we do for black students alone (see Table 12). Instead, differences in the distribution of high school grades between UM and white students serve as the main driver of the GPA differential in college.

## 4 Tables and Figures

Table 1: Distribution of Student Departure by Year Among Non-Completers

|                    | Percent of Student Dropouts |
|--------------------|-----------------------------|
| June 2005          | 12.6                        |
| June 2006          | 13.8                        |
| June 2007          | 9.7                         |
| June 2008          | 9.1                         |
| June 2009          | 9.9                         |
| June 2010          | 7.8                         |
| June 2011          | 8.8                         |
| June 2012          | 8.0                         |
| June 2013          | 11.4                        |
| Still Enrolled     | 8.9                         |
| All non-completers | 100.0                       |

Source: ELS 2012 & postsecondary transcript data.

Table 2: Fairlie Decomposition of the Proportion of the Dropout Gap Explained by Pre-College Factors

|                                      | Descriptive Data                        |
|--------------------------------------|-----------------------------------------|
| UM dropout rate                      | 0.468                                   |
| White dropout                        | 0.254                                   |
| Difference                           | -0.214                                  |
|                                      | Amount Explained by Factors & Variables |
| Female                               | 0.0006                                  |
| Pre-College SES & Family Composition | -0.02                                   |
| Pre-College Academic Performance     | -0.10                                   |
| Pre-College Curricular Risk          | -0.03                                   |
| Attitudes towards College & Career   | -0.001                                  |
| Connection to Home                   | -0.03                                   |
| <b>Total Explained</b>               | -0.17 (79%)                             |

Note: The decomposition is performed using UM students as the reference group and factors and variables are inserted into the decomposition randomly to ensure robustness of results. However, results are similar regardless of which group (UM, white, or pooled) serves as the reference and of whether variables are inserted randomly or not.

Source: ELS 2002, 2004, 2012 & postsecondary transcript data.

Table 3: Four-year College Entry Model, By Racial Group

|                                                     | UM ( $n=3,280$ ) |                            | White ( $n=7,410$ ) |                            |
|-----------------------------------------------------|------------------|----------------------------|---------------------|----------------------------|
|                                                     | <i>Coef.</i>     | <i>Std.</i><br><i>Err.</i> | <i>Coef.</i>        | <i>Std.</i><br><i>Err.</i> |
| Female                                              | -0.13            | 0.104                      | -0.20*              | 0.086                      |
| Age                                                 | -0.26*           | 0.105                      | -0.18***            | 0.051                      |
| Income \$35-\$50K                                   | 0.19             | 0.138                      | 0.09                | 0.123                      |
| Income \$50-\$75K                                   | 0.26             | 0.152                      | 0.25*               | 0.122                      |
| Income \$75-\$100K                                  | 0.84***          | 0.183                      | 0.29*               | 0.142                      |
| Income > \$100K                                     | 0.49*            | 0.211                      | 0.51**              | 0.151                      |
| Parents Married                                     | 0.02             | 0.165                      | 0.001               | 0.180                      |
| Dad Present                                         | -0.32            | 0.169                      | -0.42*              | 0.191                      |
| Mother's Ed: College or More                        | -0.01            | 0.114                      | 0.11                | 0.089                      |
| Father's Ed: College or More                        | 0.28*            | 0.112                      | 0.36***             | 0.089                      |
| HS GPA: Mid-Group                                   | 0.06             | 0.128                      | 0.43***             | 0.111                      |
| HS GPA: Highest Group                               | 0.37**           | 0.136                      | 0.88***             | 0.108                      |
| HS Curric: Intense                                  | 0.32             | 0.181                      | 0.13                | 0.153                      |
| HS Curric: Less Intense                             | -0.01            | 0.147                      | 0.023               | 0.116                      |
| HS Curric: Least Intense                            | -0.43*           | 0.168                      | -0.50***            | 0.128                      |
| Academic Risk: One Risk Factor                      | -0.20            | 0.131                      | -0.21*              | 0.091                      |
| Academic Risk: Two or More Risk Factors             | -0.17            | 0.159                      | -0.38**             | 0.136                      |
| Talk to Parents about Courses: Sometimes            | 0.06             | 0.131                      | 0.04                | 0.104                      |
| Talk to Parents about Courses: Often                | 0.04             | 0.145                      | 0.12                | 0.125                      |
| Hours per Week on Homework                          | 0.01             | 0.028                      | 0.03                | 0.026                      |
| Hours per Week on Extracurriculars                  | 0.02             | 0.028                      | 0.04                | 0.023                      |
| College Financial Aid Offered                       | 1.27***          | 0.102                      | 0.82***             | 0.086                      |
| Highest Selectivity of College Acceptance: Moderate | 1.46***          | 0.120                      | 1.86***             | 0.099                      |
| Highest Selectivity of College Acceptance: Most     | 1.84***          | 0.163                      | 1.93***             | 0.125                      |

Table 3: Four-year College Entry Model, By Racial Group

|                                                  |          |       |          |       |
|--------------------------------------------------|----------|-------|----------|-------|
| Expects blue-collar job                          | -0.12    | 0.147 | -0.44*** | 0.110 |
| Expects white-collar job                         | 0.22     | 0.120 | 0.09     | 0.096 |
| Importance of Getting Away: Somewhat             | 0.05     | 0.112 | -0.04    | 0.092 |
| Importance of Getting Away: Very                 | -0.11    | 0.135 | 0.06     | 0.111 |
| Importance of Making Money: Somewhat             | 0.23     | 0.187 | 0.14     | 0.117 |
| Importance of Making Money: Very                 | 0.32     | 0.190 | 0.06     | 0.134 |
| Importance of College Reputation: Somewhat       | 0.23     | 0.188 | 0.69***  | 0.131 |
| Importance of College Reputation: Very           | 0.52**   | 0.182 | 0.79***  | 0.133 |
| Importance of College Racial Comp.: Somewhat     | 0.12     | 0.118 | 0.12     | 0.092 |
| Importance of College Racial Comp.: Very         | 0.15     | 0.137 | -0.05    | 0.156 |
| Importance of Easy Admission Policy: Somewhat    | -0.22    | 0.130 | -0.02    | 0.098 |
| Importance of Easy Admission Policy: Very        | -0.51**  | 0.150 | -0.08    | 0.134 |
| Importance of Living at Home: Somewhat           | -0.29*   | 0.125 | -0.43*** | 0.105 |
| Importance of Living at Home: Very               | -0.40**  | 0.132 | -0.07    | 0.109 |
| Hours worked per week in HS: 25 hours or less    | 0.14     | 0.110 | 0.12     | 0.090 |
| Hours worked per week in HS: More than 25 hours  | 0.04     | 0.136 | -0.10    | 0.120 |
| Frequency of Hanging Out with Friends: Most days | 0.02     | 0.132 | 0.22     | 0.147 |
| Frequency of Hanging Out with Friends: Everyday  | -0.12    | 0.136 | 0.14     | 0.145 |
| Number of Friends Dropped out of High School     | -0.12    | 0.073 | -0.16*   | 0.063 |
| Constant                                         | -2.19*** | 0.390 | -2.10*** | 0.320 |
| Actual Predicted Entry Rate (percentage)         | 0.32     | 0.006 | 0.48     | 0.005 |
| Counterfactual Predicted Entry Rate (percentage) | 0.31     | 0.007 | 0.47     | 0.011 |

Note: Coefficients reported as effects on log odds; \*\*\* $z < .001$  \*\* $z < .01$  \* $z < .05$ .

Source: ELS 2002, 2004, 2012 & postsecondary transcript data.

Figure 1: Dropout Risk and College Entry

A. The Distribution of Dropout Risk for High School Graduates and Four-year Beginners

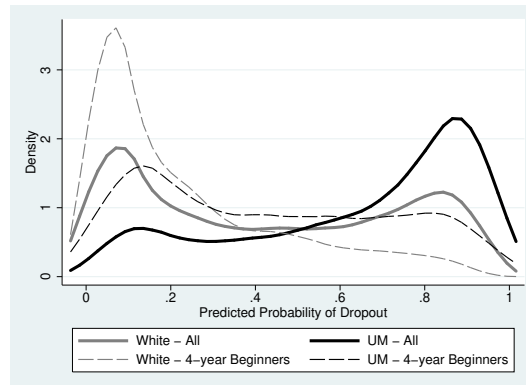

B. Entry Probability by Dropout Risk for Underrepresented Minorities and White High School Graduates

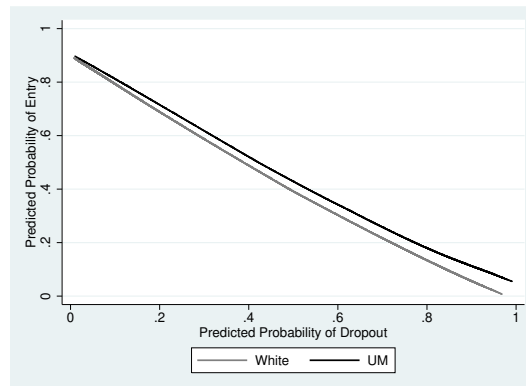

Source: ELS 2002, 2004, 2012 & postsecondary transcript data.

Figure 2: Entry Decisions and College Selectivity

A. College Entry by Pre-College Dropout Risk and Selectivity

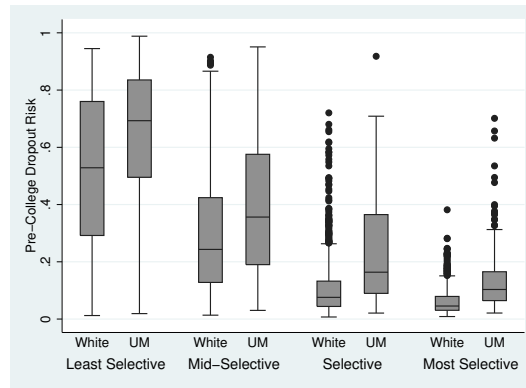

B. Percent of College-Goers Enrolled in College Selectivity Categories, by Racial Group

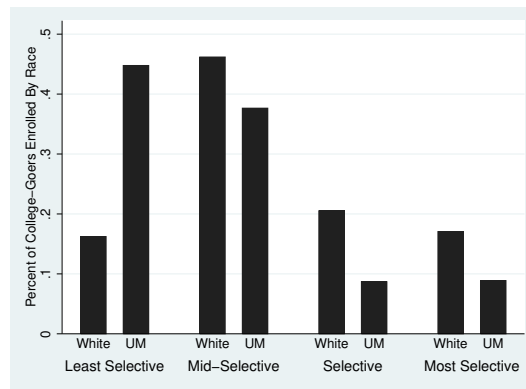

Sources: ELS 2002, 2004, 2012 & postsecondary transcript data; Barron's Profile of American Colleges, 2016.



Table 4: Effects of College Quality on Dropout Given Race and Dropout Risk

|                                              | Model 1: White<br>Students ( $n=3,520$ ) |                  | Model 2: UM<br>Students ( $n=1,060$ ) |                  | Model 3: Combined<br>( $n=4,580$ ) |                  | Model 4: Combined,<br>Including<br>Interactions<br>( $n=4,580$ ) |                  |
|----------------------------------------------|------------------------------------------|------------------|---------------------------------------|------------------|------------------------------------|------------------|------------------------------------------------------------------|------------------|
|                                              | <i>Coef.</i>                             | <i>Std. Err.</i> | <i>Coef.</i>                          | <i>Std. Err.</i> | <i>Coef.</i>                       | <i>Std. Err.</i> | <i>Coef.</i>                                                     | <i>Std. Err.</i> |
| UM                                           | —                                        | —                | —                                     | —                | 0.07                               | 0.113            | 0.21                                                             | 0.212            |
| Female                                       | -0.04                                    | 0.114            | -0.07                                 | 0.188            | -0.05                              | 0.098            | -0.05                                                            | 0.097            |
| Dropout Risk                                 | 4.87***                                  | 0.298            | 4.28***                               | 0.423            | 4.70***                            | 0.247            | 4.87***                                                          | 0.298            |
| College<br>Quality                           | -0.61***                                 | 0.124            | -0.30                                 | 0.183            | -0.54***                           | 0.102            | -0.63***                                                         | 0.124            |
| College<br>Quality *<br>Dropout Risk         | 0.61                                     | 0.351            | -0.58                                 | 0.429            | 0.23                               | 0.270            | 0.66                                                             | 0.346            |
| UM *<br>Dropout Risk                         | —                                        | —                | —                                     | —                | —                                  | —                | -0.61                                                            | 0.350            |
| UM * College<br>Quality                      | —                                        | —                | —                                     | —                | —                                  | —                | 0.31                                                             | 0.220            |
| UM *<br>Dropout Risk<br>* College<br>Quality | —                                        | —                | —                                     | —                | —                                  | —                | -1.19*                                                           | 0.554            |
| Constant                                     | -2.55***                                 | 0.123            | -2.31***                              | 0.228            | -2.52***                           | 0.107            | -2.54***                                                         | 0.116            |

Note: Results reported as effects on log odds; standard errors reported below for two-tailed tests;

\*\*\* $z < 0.001$  \*\* $z < 0.01$  \* $z < 0.05$ .

Sources: ELS 2002, 2004, 2012 & postsecondary transcript data; Barron's Profile of American Colleges, 2016; IPEDS, 2004-2009.

Table 5: Four-year Dropout Given Pre-College, Institution-Level, and College Experience Factors ( $n=4,580$ )

|                                                | <i>Coef.</i> | <i>Std. Err.</i> |
|------------------------------------------------|--------------|------------------|
| <b><i>Demographics</i></b>                     |              |                  |
| UM                                             | 0.41         | 0.391            |
| Female                                         | 0.31*        | 0.143            |
| UM*Female                                      | -0.11        | 0.268            |
| <b><i>Pre-college Variables</i></b>            |              |                  |
| Pre-College Academic Performance Factor        | -0.31**      | 0.098            |
| Pre-College Curricular Risk Factor             | 0.22**       | 0.081            |
| Pre-College Family Structure & SES Factor      | -0.12        | 0.079            |
| Pre-College Connection to Home                 | 0.16*        | 0.079            |
| Pre-College Attitudes towards College & Career | -0.07        | 0.077            |
| UM*Pre-College Academic Performance            | 0.10         | 0.268            |
| UM*Pre-College Curricular Risk                 | -0.39*       | 0.165            |
| UM*Pre-College Family SES                      | -0.07        | 0.135            |
| UM*Pre-College Connection to Home              | 0.13         | 0.157            |
| UM*Pre-College Attitudes                       | -0.07        | 0.133            |
| <b><i>Institution-level Variables</i></b>      |              |                  |
| College Quality Factor                         | -0.69***     | 0.109            |
| College Curricular Experience Factor           | 0.02         | 0.104            |
| College Financial Support Factor               | 0.11         | 0.095            |

Table 5: Four-year Dropout Given Pre-College, Institution-Level, and College Experience Factors ( $n=4,580$ )

|                                     |          |       |
|-------------------------------------|----------|-------|
| College Location Factor             | -0.01    | 0.083 |
| Percent White                       | -0.07    | 0.126 |
| Percent Black                       | -0.51**  | 0.177 |
| UM*College Quality                  | -0.28    | 0.227 |
| UM*College Curricular Experience    | 0.10     | 0.221 |
| UM*College Financial Support        | -0.13    | 0.152 |
| UM*College Location                 | -0.23    | 0.154 |
| UM*Percent White                    | 0.21     | 0.184 |
| UM*Percent Black                    | 0.63**   | 0.207 |
| <i>College Experience Variables</i> |          |       |
| College GPA                         | -1.22*** | 0.115 |
| College Curricular Risk Factor      | 0.45***  | 0.083 |
| College Academic Integration Factor | -0.13    | 0.078 |
| College Social Engagement Factor    | -0.61*** | 0.090 |
| STEM                                | -0.83*** | 0.199 |
| Arts, Humanities & Social Science   | -0.83*** | 0.205 |
| Business, Education & Trades        | -1.23*** | 0.179 |
| Live at Home with Parents           | 0.37*    | 0.173 |
| Live on Campus                      | -0.07    | 0.175 |
| UM*College GPA                      | -0.44*   | 0.210 |
| UM*College Curricular Risk          | -0.19    | 0.135 |
| UM*Academic Integration             | 0.03     | 0.147 |
| UM*Social Engagement                | 0.17     | 0.168 |
| UM*STEM                             | 0.15     | 0.362 |
| UM*Arts, Humanities & Soc. Sci.     | -0.70    | 0.416 |

Table 5: Four-year Dropout Given Pre-College, Institution-Level, and College Experience Factors ( $n=4,580$ )

|                                 |          |       |
|---------------------------------|----------|-------|
| UM*Business, Education & Trades | 0.03     | 0.357 |
| UM*Live with Parents            | -0.11    | 0.340 |
| UM*Live on Campus               | -0.72*   | 0.352 |
| Constant                        | -1.10*** | 0.183 |

Notes: Results reported as effects on log odds;

\*\*\* $z < 0.001$  \*\* $z < 0.01$  \* $z < 0.05$ .

Sources: ELS 2002, 2004, 2006, 2012 & postsecondary transcript data; Barron's Profile of American Colleges, 2016; IPEDS, 2004-2009.

Figure 3: Predicted UM and White Dropout Rates Given Social Engagement and Academic Achievement

A. Social Engagement

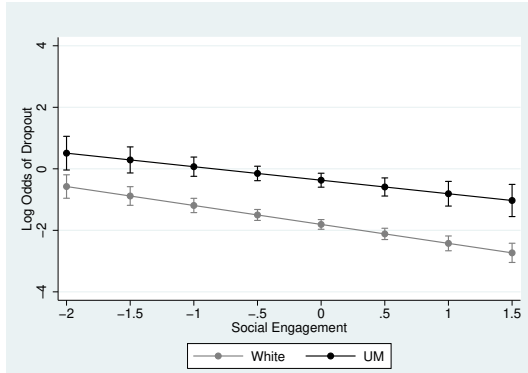

B. Academic Achievement

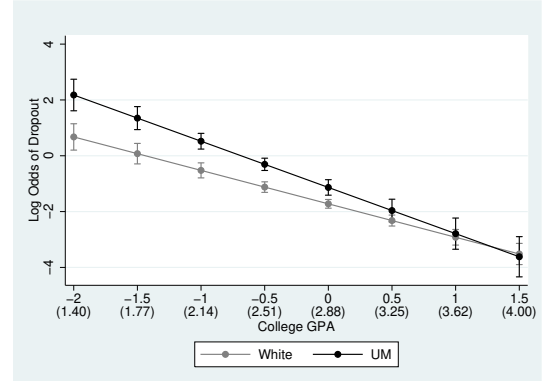

Sources: ELS 2002, 2004, 2006, 2012 & postsecondary transcript data; Barron's Profile of American Colleges, 2016; IPEDS, 2004-2009.

Figure 4: Distribution of College GPA for UM and White Students

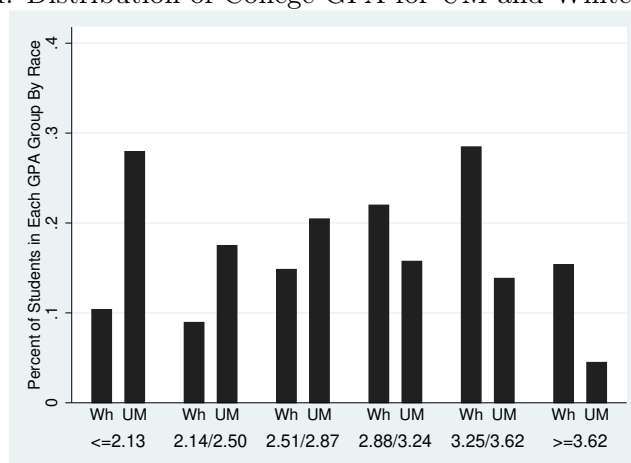

Source: ELS 2006, 2012 & postsecondary transcript data.

Table 6: Fairlie Decomposition of the Proportion of the Dropout Gap Explained by Pre-College, College-level, and College Experience Factors and Variables ( $n=4,580$ )

|                                                | Descriptive Data                        |
|------------------------------------------------|-----------------------------------------|
| UM dropout rate                                | 0.468                                   |
| White dropout                                  | 0.254                                   |
| Difference                                     | -0.214                                  |
|                                                | Amount Explained by Factors & Variables |
| Female                                         | -0.002                                  |
| Pre-College SES & Family Composition           | -0.01                                   |
| Pre-College Academic Performance               | -0.02                                   |
| Pre-College Curricular Risk                    | -0.02                                   |
| Pre-College Attitudes towards College & Career | 0.004                                   |
| Pre-College Connection to Home                 | -0.008                                  |
| College Quality                                | -0.02                                   |
| College Curricular Experience                  | -0.0008                                 |
| College Financial Support                      | 0.0008                                  |
| College Location                               | 0.0004                                  |
| College Percent Black                          | 0.05                                    |
| College Percent White                          | -0.007                                  |
| College Academic Achievement (GPA)             | -0.10                                   |
| College Curricular Risk                        | -0.03                                   |
| College Academic Integration                   | 0.002                                   |
| College Social Engagement                      | -0.03                                   |
| STEM Major                                     | 0.002                                   |
| Arts & Humanities Major                        | -0.006                                  |
| Business Major                                 | -0.007                                  |
| Living at Home                                 | -0.007                                  |
| Living on Campus                               | -0.0006                                 |
| <b>Total Explained</b>                         | <b>-0.19 (90%)</b>                      |

*Note: The decomposition is performed using UM students as the reference group and variables are inserted into the decomposition randomly to ensure robustness of results. However, results are similar regardless of which group (UM, white, or pooled) serves as the reference and of whether variables are inserted randomly or not.*

*Sources: ELS 2002, 2004, 2012 & postsecondary transcript data; Barron's Profile of American Colleges, 2016; IPEDS, 2004-2009.*

Table 7: The Effect of Race, Pre-College Factors, and College Quality on College GPA ( $n=4,580$ )

|                                             | <i>Coef.</i> | <i>Std. Err.</i> |
|---------------------------------------------|--------------|------------------|
| UM                                          | -0.36***     | 0.044            |
| Female                                      | 0.30***      | 0.030            |
| Pre-College Academic Performance Factor     | 0.34***      | 0.023            |
| Pre-College Academic Risk Factor            | -0.06**      | 0.018            |
| Pre-College Family Structure & SES Factor   | 0.04*        | 0.017            |
| Pre-College Orientation towards Home Factor | -0.04*       | 0.019            |
| Pre-College, College Expectations Factor    | -0.09***     | 0.018            |
| College Quality                             | 0.03*        | 0.015            |
| Constant                                    | -0.14***     | 0.026            |

*Note: Results reported as effects on log odds; \*\*\* $p < 0.001$  \*\* $p < 0.01$  \* $p < 0.05$ .*

*Sources: ELS 2002, 2004, 2006, 2012 & postsecondary transcript data; Barron's Profile of American Colleges, 2016; IPEDS, 2004-2009.*

Figure 5: Pre-College versus Post-College-Entry Risk Distributions

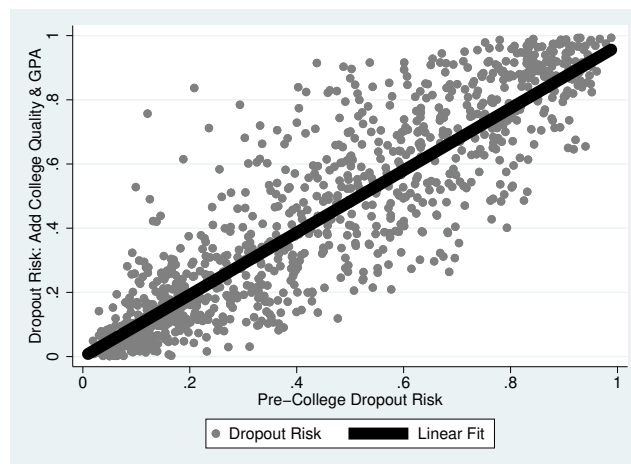

*Sources: ELS 2002, 2004, 2006, 2012 & postsecondary transcript data; Barron's Profile of American Colleges, 2016; IPEDS, 2004-2009.*

## References

- Alon, Sigal. 2015. *Race, Class, and Affirmative Action*. New York, NY: Russell Sage Foundation.
- Bowen, William G, Matthew M Chingos, and Michael S McPherson. 2009. *Crossing the finish line : completing college at America's public universities*. Princeton, N.J.: Princeton University Press.
- Carter, Deborah Faye. 2006. "Key issues in the persistence of underrepresented minority students." *New Directions for Institutional Research* 2006:33–46.
- Charles, Camille Z., Mary J. Fischer, Margarita A. Mooney, and Douglas S. Massey. 2009. *Taming the River: Negotiating the Academic, Financial, and Social Currents in Selective Colleges and Universities*. Princeton, N.J.: Princeton University Press.
- Lavin, David E. and David B. Crook. 1990. "Open Admissions and Its Outcomes: Ethnic Differences in Long-Term Educational Attainment." *American Journal of Education* 98:389–425.
- Light, Audrey and Wayne Strayer. 2002. "From Bakke to Hopwood: Does Race Affect College Attendance and Completion?" *Review of Economics and Statistics* 84:34–44.
- Rendón, Laura I., Romero E. Jalomo, and Amaury Nora. 2000. "Part II: New Theoretical Directions: Theoretical Considerations in the Study of Minority Student Retention in Higher Education." In *Reworking the Student Departure Puzzle*, pp. 125–156. Vanderbilt University Press.
- Snyder, Thomas D., Cristobal de Brey, and Sally A. Dillow. 2016. "Digest of Education Statistics 2014." Technical report, U.S. Department of Education.
